# Supplementary material
Source: PubMed Central journal article supplement (PMC3522232)

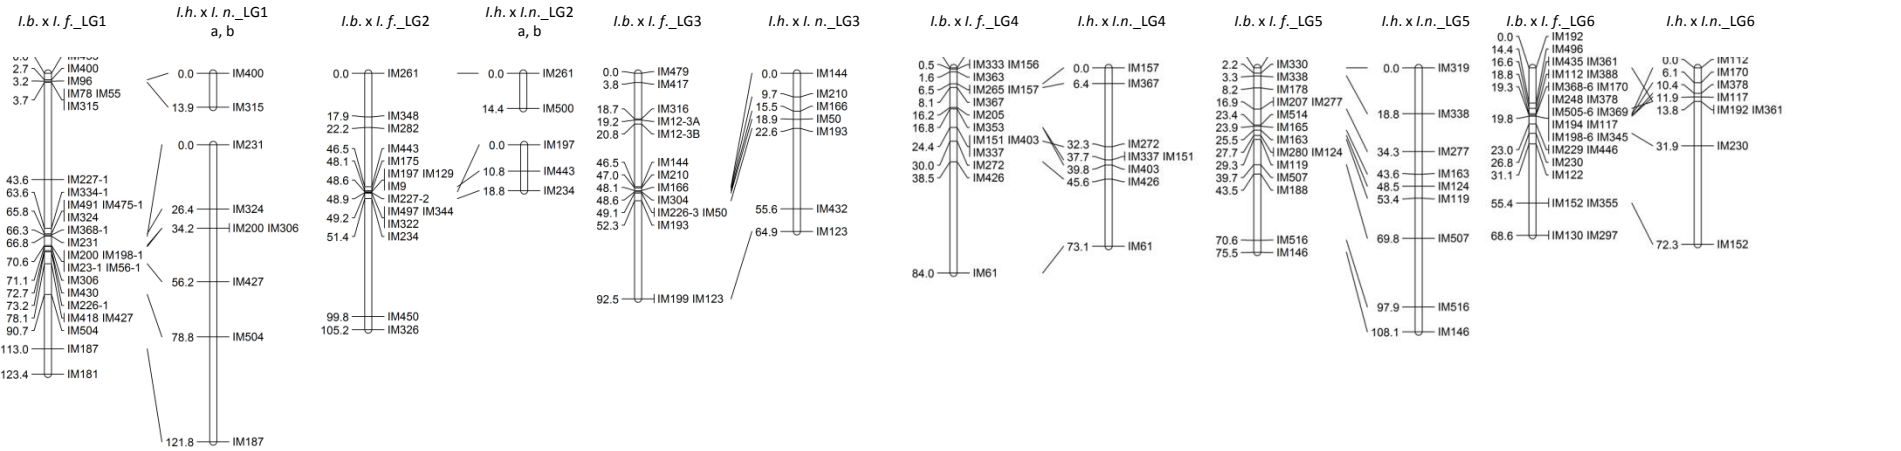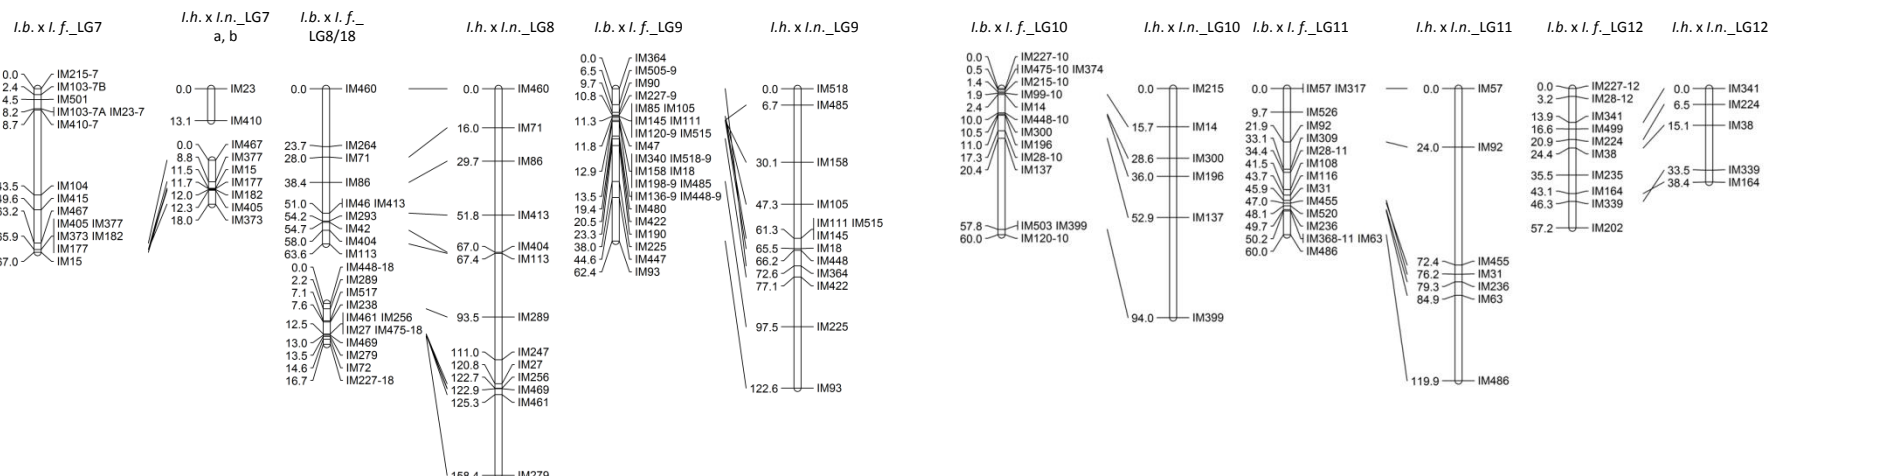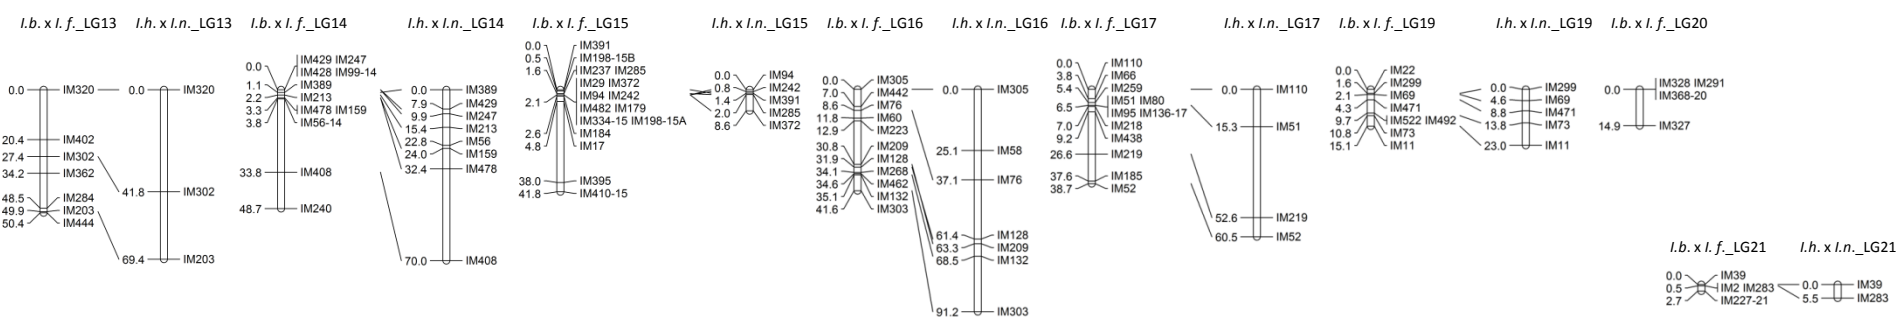

Supplement: hdy201262x1.pdf [file hdy201262x1.pdf]
